1 Concordance of weight status between mothers and children: A secondary  
2 analysis of the Pakistan Demographic and Health Survey VII

3

4

5

6 Faiz Alam <sup>1,2,3</sup>, Mohammed K. Ali <sup>3,4,5</sup>, Shivani A. Patel <sup>3,5</sup>, Romaina Iqbal <sup>6\*</sup>

7

8 <sup>1</sup> Yale School of Public Health, Yale University, New Haven, Connecticut, United States  
9 of America

10 <sup>2</sup> School of Medicine, Emory University, Atlanta, Georgia, United States of America

11 <sup>3</sup> Hubert Department of Global Health, Rollins School of Public Health, Emory  
12 University, Atlanta, Georgia, United States of America

13 <sup>4</sup> Department of Family and Preventive Medicine, School of Medicine, Emory University,  
14 Atlanta, Georgia, United States of America

15 <sup>5</sup> Global Diabetes Research Center, Woodruff Health Sciences Center, Emory  
16 University, Atlanta, Georgia, United States of America

17 <sup>6</sup> Department of Community Health Sciences, Aga Khan University, Karachi, Sindh,  
18 Pakistan

19

20 \* Corresponding Author

21 Email: [romaina.iqbal@aku.edu](mailto:romaina.iqbal@aku.edu) (RI)

## 22 **Abstract**

23 Familial concordance of nutritional status is an emerging field of study that may guide the  
24 development of interventions that operate beyond the individual and within the family  
25 context. Little published data exist for concordance of nutritional status within Pakistani  
26 households. We assessed the associations between weight status of mothers and their  
27 children in a nationally representative sample of households in Pakistan using  
28 Demographic and Health Survey data. Our analysis included 3465 mother-child dyads,  
29 restricting to children under-five years of age with body mass index (BMI) information on  
30 their mothers. We used linear regression models to assess the associations between  
31 maternal BMI category (underweight, normal weight, overweight, obese) and child's  
32 weight-for-height z-score (WHZ), accounting for socio-demographic characteristics of  
33 mothers and children. We assessed these relationships in all children under-five and also  
34 stratified by age of children (younger than 2 years and 2 to 5 years). In all children under-  
35 five and in children 2 to 5 years, maternal BMI was positively associated with child's WHZ,  
36 while there was no association between maternal BMI and child WHZ for children under-  
37 two. The findings indicate that the weight status of mother's is positively associated with  
38 that of their children. These associations have implications for interventions aimed at  
39 healthy weights of families.

40

41

## 42 Introduction

43           There is a growing body of literature focusing on concordance of cardiometabolic  
44 disease risk factors and outcomes within families and households, suggesting that NCD  
45 prevention programs may be more effective if the family – rather than the individual – was  
46 targeted for intervention. Studies show increased likelihood of adults living with someone  
47 with a chronic condition, such as obesity, diabetes, hypertension, hyperlipidemia, and  
48 other cardiometabolic conditions, having that same condition. This includes concordance  
49 between parent-child [1,2], sibling [3,4], spousal dyads [5], and between any co-residing  
50 members of households [6,7]. These studies investigate the genetic predisposition to  
51 disease [6], as can be seen in strictly familial relationships, and also the effect of the  
52 shared environment [8] and health behavior influences [9,10], such as in co-residing  
53 studies.

54           Intergenerational concordance within households – and specifically that between  
55 parents and children – may reflect a composite of genetic, epigenetic, and shared  
56 environmental factors. The magnitude of intergenerational concordance of NCD risk  
57 within households in Pakistan is largely unknown. Studies focusing on parent-child  
58 concordance have been primarily done in high-income countries, such as in the United  
59 Kingdom and Australia [11–16]. There is some evidence from low- and middle-income  
60 countries (LMICs) regarding concordance of biomarkers such as hemoglobin A1c and C-  
61 reactive protein [2]. Specifically in South Asia, studies show statistically significant  
62 associations between child under-five obesity and maternal weight, but do not further  
63 stratify these relationships by child age [17,18].

64           Within Pakistan, there is particular importance of the parent-child dyad. Pakistan  
65   has one of the highest average household sizes and percentage of multigenerational  
66   households in the world, suggesting extended sharing of environment between  
67   generations. Moreover, Pakistan is following a global trend of increasing life expectancy,  
68   signaling a large population of individuals at higher risk of developing NCDs that the  
69   Pakistani healthcare system will have to manage in the future [19]. Additionally, children  
70   in Pakistan are becoming increasingly vulnerable to different forms of malnutrition: in the  
71   2018 Pakistan National Nutrition Survey (PNNS), wasting was noted in 17.7% of children,  
72   the highest in Pakistan's history, and prevalence of overweight children under-five almost  
73   doubled from 5% in 2011 to 9.5% in 2018. Similarly, women ages 15-49 experienced an  
74   increase in overweight and obesity increasing from 28% to 37.8% from 2011 to 2018 [20].  
75   This parallel increase in excess weight across a wide range of Pakistani age  
76   demographics may have important implications for cardiometabolic disease at the  
77   population level. Thus, there is a need to study Pakistani household concordance of NCD  
78   risk factors to further understand the extent, if present, of household concordance in  
79   Pakistan, especially with an additional focus on parent-child concordance to advocate for  
80   interventions that involve the full household, and not only prevention for adults.

81           In the present study, we analyzed the concordance of maternal and child weight  
82   status, a critical risk factor for NCDs. We further investigate the dynamics of these  
83   associations across different age groups of children under 5.

## 84 **Materials and Methods**

### 85 **Data sources and participants**

86  
87 Pakistan's Demographic and Health Survey, Round VII (PDHS-7) survey was  
88 conducted in 2017-18 by the National Institute of Population Studies and funded by the  
89 United States Agency for International Development (USAID). PDHS-7 was the 7<sup>th</sup>  
90 round of a nationally representative survey, with information about household,  
91 demographic, and maternal and child health indicators. The survey design and sample  
92 size calculations were formulated to provide reliable information at the national level and  
93 subnational levels, as well as for urban and rural areas separately, with data collected  
94 from the four provinces of Punjab, Sindh, Khyber Pakhtunkhwa, and Balochistan, the  
95 regions of Azad Jammu and Kashmir and Gilgit Baltistan, the Islamabad Capital  
96 Territory, and the Federally Administered Tribal Areas. The sampling design used a  
97 two-stage stratified approach and, because of non-proportional sample allocation, the  
98 sample weights were generated by the PDHS team. Participants were recruited and  
99 data was collected from November 2017 to April 2018

100 The respondents included all ever-married women aged 15-49 in all selected  
101 households. In one-third of the selected households, height and weight were directly  
102 measured for ever-married women 15-49 and children under-five years of age. For this  
103 study, we included all children under-five who had WHZ information and BMI  
104 information on their mothers, leading to a sampling-weight adjusted sample size of  
105 3465. Fig 1 depicts the sampling scheme and relevant response rates for PDHS-7 [21].

Fig 1. Flow diagram of household and participant selection for the 2017-18 Pakistan Demographic and Health Survey.

106           The study was reviewed and approved by the National Bioethics Committee of  
107 the Pakistan Health Research Council and the Inner City Fund/ ICF Institutional Review  
108 Board. Adult participants were consented both, for themselves and for their children  
109 [21]. Prior to obtaining access to and performing analysis on the PDHS-7 data, the  
110 researchers of the present study submitted a concept note, gained data access, and  
111 obtained permission from USAID. The data were de-identified and anonymized by the  
112 DHS program prior to being shared, therefore not considered human subjects research  
113 by an author-affiliated institution (Emory University, Atlanta, GA, USA) and not requiring  
114 further ethical clearance.

## 115 **Study Measures**

116

### 117 **Child weight status: Weight-for-height z-score (WHZ)**

118           Child weight and height measurements were taken during a single visit. Weight  
119 measurements were taken using SECA scales (model no. SECA 878U) and height  
120 measurements using a Shorr Board (recumbent if child's age was less than 24 months  
121 and standing if older). Anthropometry data in PDHS-7 was collected by two female  
122 enumerators in each field team (total of 44 enumerators) who jointly took  
123 measurements. All enumerators were trained beforehand to standardize procedures for  
124 anthropometry, including hands-on training to measure ten children twice to assess  
125 accuracy and precision of measurements and further training for those enumerators  
126 who were out of range more three or more times [21].

127           The dependent variable was weight-for-height z-score (WHZ) for children under-  
128 five per the 2006 Child Growth Standards released by the World Health Organization,  
129 reliably shown to describe both overweight (WHZ > 2) and wasting (WHZ < -2) [22].

130 Every one unit in z-score represents one standard deviation from the mean weight-for-  
131 height from a study of more than eight thousand children recruited from Brazil, Ghana,  
132 India, Norway, Oman and the United States of America [23,24]. For example, a WHZ of  
133 -2 indicates that the child's weight is two standard deviations below the mean for their  
134 height and sex [25].

### 135 **Maternal weight status: Body Mass Index (BMI)**

136 The primary exposure of interest for this study was maternal BMI. BMI was  
137 measured in the same way as child WHZ, with SECA 878U scales and Shorr Boards  
138 (standing height measurement). Maternal BMI was coded as obese (30 or greater),  
139 overweight (25 to less than 30), healthy weight (18.5 to less than 25), and underweight  
140 (less than 18.5), which was the reference category ([ref]).

### 141 **Covariates**

142 Several other covariates were also considered in the analysis. A covariate was  
143 included in statistical the models if it had evidence of correlation with child weight  
144 outcome and if there was sufficient variation in the covariate for it to add information to  
145 the model, e.g. if a factor has 99% 'yes' response rate and 1% 'no' rate, then its use  
146 was avoided because it would not meaningfully explain variation in the outcome.

147 Through this process, the following eight covariates were selected for analysis: urban/  
148 rural specific wealth index [18,22,26–28], sex of child [22,26], mother's employment  
149 status[26,27,29], type of place of residence [28,30–32], mother's youngest child under-  
150 five [28,33,34], mother's oldest child under-five [28,33,34], child age in months, and  
151 maternal age in years [29,33,34].

152 Household wealth status was measured as quintiles of assets as provided by the  
153 PDHS-7 survey. Wealth index quintile categories were labeled as richest, rich, middle,  
154 poor, poorest[ref]. Child sex was coded as male or female[ref]. Type of place of  
155 residence was coded as urban or rural[ref]. Mother's employment status, youngest child  
156 under-five and oldest child under-five were all codes as no or yes[ref].

## 157 **Analysis**

158  
159 A dyadic dataset of mothers and their children was created by merging  
160 anthropometric and demographic characteristics of mothers and children per DHS  
161 guidance for analysis. Mother's characteristics were treated as exposures for the child  
162 [35]. Furthermore, in studying cardiometabolic risk concordance between younger  
163 children and their mothers, it is important to consider the impact of children being born  
164 small for gestational age (SGA) can have on anthropometric concordance. This is  
165 particularly important consideration in Pakistan, where the prevalence of SGA births is  
166 >45% [36]. As approximately 85% of children born SGA have experienced sufficient  
167 catch up growth by age 2 [37–39], stratifying analysis by this age point in relation to  
168 concordance which, to our knowledge, has not been done before, could yield important  
169 findings regarding the 'unmasking' of parent-child concordance. Thus, we stratified  
170 children by two years of age in our analysis and modeling.

171 All analysis and modeling accounted for the complex survey design [35]. All data  
172 restructuring and analysis was done using IBM SPSS Statistics v29.0.0.0 with Complex  
173 Samples v29. The code used for restructuring and analysis can be found via the  
174 following link: [doi:10.5281/zenodo.7794384](https://doi.org/10.5281/zenodo.7794384).



## 175 **Descriptive statistics**

176  
177 Reported statistics (sampling weight-adjusted) included background  
178 characteristics of the participants which include average age of mother (in years) and  
179 children (in months), mean BMI of mothers, and mean child WHZ with 95% confidence  
180 intervals. Other reported adjusted population descriptive statistics were percentage of  
181 dyads that were urban vs rural, percentage of male and female children, percentage of  
182 mothers currently employed, percentage of children being the youngest child,  
183 percentage of children being the oldest under-five, and the percentage of the sample  
184 size in each wealth index quintile. The mean child WHZ with 95% confidence interval  
185 and sampling weight-adjusted sample size was also reported for each factor level.

## 186 **Modeling associations between maternal and child weight status**

187  
188 We estimated linear regression models to investigate concordance between  
189 maternal BMI and child WHZ, measured continuously. Three linear models were  
190 generated: 1) all children under-five years, 2) all children under-two years, 3) all children  
191 ages 2 to 5, with the models adjusted for the 8 covariates. We reported the  $R^2$  value and  
192 the Wald F for each model and reported the parameter estimates with 95% confidence  
193 interval and t-test value for each categorical level. For each model, the statistically  
194 significant variables were remodeled including only these variables and an additional  
195 term for each two-variable combination to assess for interaction between the statistically  
196 significant variables. Cases with missing values for any variables were treated as  
197 invalid. Associations for all models were considered statistically significant when  $p <$   
198 0.05.

## 199 **Further Considerations for Analysis**

200  
201 We assessed multicollinearity between the independent variables using the  
202 variance inflation factor (VIF) calculation. We used a conservative cutoff of 3, as an  
203 indicator to further investigate relationships [40]. Using this cutoff, no multicollinearity  
204 was observed among the independent variables. To account for multiple comparisons  
205 and counter the increased risk of Type I error, the Holm-Bonferroni method was used to  
206 adjust the P-value of 0.05 accordingly [41,42]. Regarding outliers, the DHS data is  
207 screened before dissemination for plausibility of Z-scores. For children who had WHZ  
208 that were below -5 standard deviations or above +5 standard deviations were flagged  
209 and their WHZ was not reported. Similarly, women who had BMI below 12 or above 60  
210 were also flagged and did not have their BMI reported [35]. Further consideration of  
211 outliers was not made because of these adjustments by the PDHS data processing  
212 team.

## 213 **Results**

214 For the analysis, out of 4671 sample unweighted cases, 4130 had complete  
215 variable information (with 541 missing) and were included, which led to a sampling-weight  
216 adjusted sample size of 3465. With cases that had information on maternal BMI and child  
217 WHZ, only two did not have complete information on the other covariates.

## 218 **Summary Statistics**

219  
220 Of the overall sampling weight-adjusted sample of 3465 children (Fig. 1), 1406  
221 (40.6%) children were less than 2 years old, and 2059 (59.4%) children were ages 2 to  
222 5. The mean age of mothers was 29.0 years (95% CI [28.6, 29.4]) and children under-  
223 five years was 28.8 months (95% CI [28.0, 29.5]). The mean maternal BMI was 24.6

224 (95% CI [24.2, 25.1]). The mean child WHZ for the entire sample was -0.30 (95% CI [-  
225 0.36, -0.24]), mean child WHZ for children under-two was -0.41 (95% CI [-0.50, -0.31]),  
226 and mean child WHZ for children ages 2 to 5 was -0.23 (95% CI [-0.29, -0.16]). The  
227 greatest mean child WHZ was in children who belonged to the richest quintile of  
228 households at 0.04 (95% CI [-0.09, 0.17]), and the category with the lowest mean child  
229 WHZ was children with mothers who were underweight at -0.66 (95% CI [-0.80, -0.51]).  
230 Table 1 summarizes maternal, child, and household characteristics of the analyzed  
231 maternal-child dyads and the mean child WHZ for each factor level is summarized in  
232 Table 2.

233

234

235

236

237

238

239

240

241

242

243

244

245

246

247 Table 1: Percentage of sample in each factor level and mean values of continuous variables (n=3465),  
 248 with 95% confidence interval from PDHS-7 dataset used in analysis.

| Variable                                    | All                  | Children under two      | Children 2 to 5 years |
|---------------------------------------------|----------------------|-------------------------|-----------------------|
| <b>Maternal Characteristics</b>             |                      |                         |                       |
|                                             |                      | <b>Percent (95% CI)</b> |                       |
| <b>Maternal BMI Category</b>                |                      |                         |                       |
| 30+                                         | 15.7 (13.1 – 18.8)   | 13.1 (10.4 – 16.4)      | 17.5 (14.5 – 20.9)    |
| 25 to < 30                                  | 27.6 (24.8 – 30.6)   | 27.9 (24.5 – 31.7)      | 27.4 (24.3 – 30.7)    |
| 18.5 to <25                                 | 46.2 (42.9 – 49.6)   | 46.7 (42.6 – 50.8)      | 45.9 (42.1 – 49.8)    |
| <18.5                                       | 10.4 (8.5 – 12.7)    | 12.3 (9.9 – 15.1)       | 9.2 (7.2 – 11.7)      |
| <b>Mother currently employed</b>            |                      |                         |                       |
| No                                          | 86.7 (83.9 – 89.0)   | 34.6 (30.1 – 39.4)      | 31.4 (27.6 – 35.5)    |
| Yes                                         | 13.3 (11.0 – 16.1)   | 65.4 (60.6 – 69.9)      | 68.6 (64.5 – 72.4)    |
|                                             |                      | <b>Mean (95% CI)</b>    |                       |
| <b>Maternal BMI</b>                         | 24.6 (24.2, 25.1)    | 24.3 (23.8, 24.8)       | 24.9 (24.4, 25.4)     |
| <b>Maternal Age (yrs.)</b>                  | 29.0 (28.6, 29.4)    | 27.4 (26.9, 27.9)       | 30.3 (29.6, 30.5)     |
| <b>Child Characteristics</b>                |                      |                         |                       |
|                                             |                      | <b>Percent (95% CI)</b> |                       |
| <b>Youngest child</b>                       |                      |                         |                       |
| No                                          | 34.3 (32.8 – 35.9)   | 5.5 (4.2 – 7.2)         | 54 (51.3 – 56.7)      |
| Yes                                         | 65.7 (64.1 – 67.2)   | 94.5 (92.8 – 95.8)      | 46 (43.3 – 48.7)      |
| <b>Oldest child under-five</b>              |                      |                         |                       |
| No                                          | 32.5 (30.9 – 34.1)   | 56.4 (52.9 – 59.8)      | 16.2 (14.3 – 18.2)    |
| Yes                                         | 67.5 (65.9 – 69.1)   | 43.6 (40.2 – 47.1)      | 83.8 (81.8 – 85.7)    |
| <b>Sex of child</b>                         |                      |                         |                       |
| Male                                        | 51.1 (49.1 – 53.1)   | 51.2 (47.3 – 55.0)      | 51.0 (48.7 – 53.3)    |
| Female                                      | 48.9 (46.9 – 50.9)   | 48.8 (45.0 – 52.7)      | 49.0 (46.7 – 51.3)    |
|                                             |                      | <b>Mean (95% CI)</b>    |                       |
| <b>Child WHZ</b>                            | -0.30 (-0.36, -0.24) | -0.41 (-0.50, -0.31)    | -0.23 (-0.29, -0.16)  |
| <b>Child Age (mos.)</b>                     | 28.8 (28.0, 29.5)    | 11.0 (10.5, 11.5)       | 40.9 (40.4, 41.5)     |
| <b>Household Characteristics</b>            |                      |                         |                       |
|                                             |                      | <b>Percent (95% CI)</b> |                       |
| <b>Area</b>                                 |                      |                         |                       |
| Urban                                       | 32.7 (29.1 – 36.6)   | 34.6 (30.1 – 39.4)      | 31.4 (27.6 – 35.5)    |
| Rural                                       | 67.3 (63.4 – 70.9)   | 65.4 (60.6 – 69.9)      | 68.6 (65.4 – 72.4)    |
| <b>Wealth index (urban/ rural specific)</b> |                      |                         |                       |
| Richest                                     | 18.3 (14.7 – 22.5)   | 19.1 (14.7 – 24.5)      | 17.7 (14.1 – 21.9)    |
| Richer                                      | 20.3 (17.0 – 24.0)   | 21.9 (18.0 – 26.3)      | 19.1 (15.7 – 23.1)    |
| Middle                                      | 20.1 (17.4 – 23.0)   | 20.2 (17.0 – 23.9)      | 19.9 (17.0 – 23.2)    |
| Poor                                        | 21.4 (18.4 – 24.8)   | 20.2 (16.8 – 24.1)      | 22.3 (18.8 – 26.1)    |
| Poorest                                     | 20.0 (16.5 – 24.0)   | 18.6 (15.1 – 22.5)      | 21.0 (16.8 – 25.8)    |

249

250 Table 2: Mean Child WHZ and sampling weight-adjusted sample size (Adj. N) of analyzed sample,  
251 stratified by level of selected factors.

| Variable                                    | Adj. N | Mean child WHZ (95% CI) |
|---------------------------------------------|--------|-------------------------|
| <b>All</b>                                  | 3465   | -0.3 (-0.36, -0.24)     |
| <b>Maternal BMI Category</b>                |        |                         |
| 30+                                         | 545    | -0.02 (-0.16, 0.11)     |
| 25 to < 30                                  | 956    | -0.14 (-0.25, -0.03)    |
| 18.5 to <25                                 | 1602   | -0.41 (-0.51, -0.31)    |
| <18.5                                       | 361    | -0.66 (-0.8, -0.51)     |
| <b>Mother currently employed</b>            |        |                         |
| No                                          | 3003   | -0.29 (-0.36, -0.23)    |
| Yes                                         | 462    | -0.35 (-0.52, -0.19)    |
| <b>Youngest child</b>                       |        |                         |
| No                                          | 1189   | -0.21 (-0.29, -0.13)    |
| Yes                                         | 2276   | -0.35 (-0.42, -0.28)    |
| <b>Oldest child under-five</b>              |        |                         |
| No                                          | 1126   | -0.4 (-0.51, -0.28)     |
| Yes                                         | 2339   | -0.26 (-0.32, -0.2)     |
| <b>Sex of child</b>                         |        |                         |
| Male                                        | 1770   | -0.32 (-0.39, -0.24)    |
| Female                                      | 1695   | -0.29 (-0.36, -0.21)    |
| <b>Area</b>                                 |        |                         |
| Urban                                       | 1134   | -0.31 (-0.4, -0.21)     |
| Rural                                       | 2331   | -0.30 (-0.37, -0.22)    |
| <b>Wealth index (urban/ rural specific)</b> |        |                         |
| Richest                                     | 633    | 0.04 (-0.09, 0.17)      |
| Richer                                      | 702    | -0.17 (-0.29, -0.06)    |
| Middle                                      | 695    | -0.36 (-0.5, -0.22)     |
| Poor                                        | 743    | -0.52 (-0.64, -0.4)     |
| Poorest                                     | 693    | -0.45 (-0.58, -0.31)    |

252  
253

## 254 **Associations between mother and child weight status**

255  
256 Maternal BMI was positively associated with child WHZ for all children among  
257 children under-five. Children of normal weight, overweight, and obese women had WHZ  
258 scores that were 0.22 [95% CI: 0.05, 0.38], 0.44 [95% CI: 0.26, 0.63], and 0.53 [95% CI:  
259 0.33, 0.73] units higher than children of underweight women, respectively. Maternal BMI  
260 was also positively associated with child WHZ among children ages 2 to 5, where children  
261 of normal weight, overweight, and obese women had WHZ scores that were 0.27 [95%

262 CI: 0.09, 0.44), 0.51 [95% CI: 0.30, 0.72), and 0.61 [95% CI: 0.37, 0.85] units higher than  
263 children of underweight women, respectively.

264 For all children under-five, household wealth index was positively associated with  
265 child WHZ (Richest: 0.37 [95% CI: 0.18, 0.55]; Rich: 0.19 [95% CI: 0.02, 0.37]; Middle:  
266 0.01 [95% CI: -0.17, 0.20]; Poor: -0.12 [95% CI: -0.30, 0.06]; Poorest [ref.]). Household  
267 wealth was similarly positively associated with child WHZ for children under 2 (Richest:  
268 0.44 [95% CI: 0.13, 0.74]; Rich: 0.21 [95% CI: -0.08, 0.49]; Middle -0.31 [95% CI: -0.58, -  
269 0.44]; Poor: -0.15 [95% CI: -0.46, 0.17]; Poorest: [ref]) and for children aged two to five  
270 (Richest: 0.31 [95% CI: 0.11, 0.51]; Rich: 0.17 [95% CI: -0.01, 0.35]; Middle 0.23 [95%  
271 CI: 0.03, 0.43]; Poor -0.10 [95% CI: -0.28, 0.07]; Poorest: [ref.]).

272 There were no statistically significant interaction effects for any linear model. Table  
273 3 summarizes information for each model.

274

275

276

277

278

279

280

281

282

283

284 Table 3: Linear regression results of the association between maternal BMI and child WHZ, along with  
 285 selected covariates, among three population groups: all children under-five, children under-two, children 2  
 286 to 5.

| Variable<br>(Category)                          | All children under-five |         |                    | Children under-two      |         |                   | Children 2 to 5 years   |         |                    |
|-------------------------------------------------|-------------------------|---------|--------------------|-------------------------|---------|-------------------|-------------------------|---------|--------------------|
|                                                 | Coefficient (95%<br>CI) | t-value | p                  | Coefficient (95%<br>CI) | t-value | p                 | Coefficient (95%<br>CI) | t-value | p                  |
| <b>Mother BMI category</b>                      |                         |         | <b>(&lt;0.001)</b> |                         |         | <b>0.130</b>      |                         |         | <b>(&lt;0.001)</b> |
| 30 or greater                                   | 0.53(0.33, 0.73)        | 5.201   | <.001              | 0.32(-0.02, 0.67)       | 1.836   | 0.067             | 0.61(0.37, 0.85)        | 5.043   | <.001              |
| 25 to <30                                       | 0.44(0.26, 0.63)        | 4.670   | <.001              | 0.26(-0.05, 0.57)       | 1.642   | 0.101             | 0.51(0.30, 0.72)        | 4.857   | <.001              |
| 18.5 to <25                                     | 0.22(0.05, 0.38)        | 2.587   | 0.010              | 0.06(-0.21, 0.34)       | 0.447   | 0.655             | 0.27(0.09, 0.44)        | 2.945   | 0.003              |
| less than 18.5                                  | *                       |         |                    | *                       |         |                   | *                       |         |                    |
| <b>Mother currently working</b>                 |                         |         | <b>0.363</b>       |                         |         | <b>0.812</b>      |                         |         | <b>0.168</b>       |
| No                                              | -0.08(-0.25, 0.09)      | -0.910  | 0.363              | 0.03(-0.21, 0.28)       | 0.265   | 0.791             | -0.14(-0.33, 0.05)      | -1.423  | 0.155              |
| Yes                                             | *                       |         |                    | *                       |         |                   | *                       |         |                    |
| <b>Youngest child</b>                           |                         |         | <b>0.020</b>       |                         |         | <b>0.024</b>      |                         |         | <b>0.065</b>       |
| No                                              | 0.15(0.02, 0.27)        | 2.335   | 0.020              | 0.36(0.05, 0.67)        | 2.285   | 0.023             | 0.11(-0.03, 0.25)       | 1.574   | 0.116              |
| Yes                                             | *                       |         |                    | *                       |         |                   | *                       |         |                    |
| <b>Oldest child under-five</b>                  |                         |         | <b>0.519</b>       |                         |         | <b>0.650</b>      |                         |         | <b>0.667</b>       |
| No                                              | -0.05(-0.19, 0.10)      | -0.646  | 0.519              | -0.05(-0.24, 0.14)      | -0.491  | 0.624             | -0.05(-0.25, 0.16)      | -0.445  | 0.657              |
| Yes                                             | *                       |         |                    | *                       |         |                   | *                       |         |                    |
| <b>Sex of child</b>                             |                         |         | <b>0.420</b>       |                         |         | <b>0.178</b>      |                         |         | <b>0.934</b>       |
| Male                                            | -0.04(-0.14, 0.06)      | -0.808  | 0.420              | -0.12(-0.3, 0.06)       | -1.358  | 0.175             | 0.00(-0.10, 0.11)       | 0.045   | 0.964              |
| Female                                          | *                       |         |                    | *                       |         |                   | *                       |         |                    |
| <b>Area</b>                                     |                         |         | <b>0.474</b>       |                         |         | <b>0.768</b>      |                         |         | <b>0.455</b>       |
| Urban                                           | -0.04(-0.15, 0.07)      | -0.723  | 0.470              | -0.03(-0.21, 0.16)      | -0.287  | 0.774             | -0.05(-0.19, 0.08)      | -0.785  | 0.433              |
| Rural                                           | *                       |         |                    | *                       |         |                   | *                       |         |                    |
| <b>Wealth index (urban/ rural<br/>specific)</b> |                         |         | <b>(&lt;.001)</b>  |                         |         | <b>(&lt;.001)</b> |                         |         | <b>(&lt;.001)</b>  |
| Richest                                         | 0.37(0.18, 0.55)        | 3.942   | <.001              | 0.44(0.13, 0.74)        | 2.825   | 0.005             | 0.31(0.11, 0.51)        | 3.088   | 0.002              |
| Rich                                            | 0.19(0.02, 0.37)        | 2.155   | 0.032              | 0.21(-0.08, 0.49)       | 1.413   | 0.158             | 0.17(-0.01, 0.35)       | 1.812   | 0.071              |
| Middle                                          | 0.01(-0.17, 0.2)        | 0.139   | 0.889              | -0.31(-0.58, -0.04)     | -2.271  | 0.024             | 0.23(0.03, 0.43)        | 2.227   | 0.026              |
| Poor                                            | -0.12(-0.3, 0.06)       | -1.341  | 0.181              | -0.15(-0.46, 0.17)      | -0.916  | 0.360             | -0.10(-0.28, 0.07)      | -1.168  | 0.244              |
| Poorest                                         | *                       |         |                    | *                       |         |                   | *                       |         |                    |
| <b>Mother age (yrs)</b>                         | 0.00(-0.01, 0.01)       | -0.130  | 0.897              | 0.00(-0.02, 0.02)       | 0.229   | 0.819             | -0.01(-0.02, 0.00)      | -2.490  | <b>0.019</b>       |
| <b>Child age (mos)</b>                          | 0.00(0.00, 0.01)        | 0.340   | 0.734              | 0.01(0.00, 0.02)        | 1.312   | 0.190             | -0.01(-0.02, 0.00)      | -2.490  | <b>0.528</b>       |
| <b>R<sup>2</sup></b>                            | <b>0.050</b>            |         |                    | <b>0.060</b>            |         |                   | <b>0.064</b>            |         |                    |
| <b>Wald F</b>                                   | <b>8.551</b>            |         |                    | <b>3.885</b>            |         |                   | <b>9.147</b>            |         |                    |

287 *Overall variable p-values in parenthesis denote statistically significant associations (Holm-Bonferroni*  
 288 *corrected)*

289 *\* denotes reference category*

## 290 Discussion and Conclusion

291 We found that maternal BMI was positively associated with child WHZ in children  
 292 under 5. This positive association was present for children ages 2 to 5, even after  
 293 accounting for several socio-demographic factors, but not for children under-two. The  
 294 findings suggest that there is intergenerational concordance in weight status in Pakistani  
 295 mothers and young children which is unmasked with increased age.

296           The findings of parent-child concordance of BMI-WHZ for all children under-five  
297 are consistent with previous literature which specifically explore parent-child concordance  
298 of NCD risk [2,11–16] and of association studies in South Asia which have observed a  
299 positive association between maternal and children under-five weight status [17,18].  
300 However, previously described phenomenon of the double burden of malnutrition at  
301 household level (DBMHL) suggests co-existence of undernourished children and  
302 overweight mothers in the same household, but this phenomenon is primarily described  
303 for child stunting and, in some cases, underweight [43–51]. Although a recent study by  
304 Biswas et al., in which they analyzed the co-existence of overweight mothers with all types  
305 of undernourished children under-five (stunted, wasted, and underweight) in South and  
306 Southeast Asia from 2006 to 2017 data, described positive relationships between  
307 maternal weight status and all three types of child undernutrition, with the greatest co-  
308 existence in Pakistan. However, this study did not analyze the relationship between non-  
309 overweight or obese mothers and their children, nor did it split the children under-five into  
310 two age groups [52].

311           Furthermore, double burden of malnutrition (DBM) at the country or population  
312 level is well-established in previous literature [53–56]. DBM prevalence has been  
313 increasing in Pakistan as shown by PNNS 2018 results, with wasting noted in 17.7% of  
314 children, the highest in Pakistan’s history, prevalence of overweight children under-five  
315 almost doubling from 5% in 2011 to 9.5% in 2018, and women ages 15-49 experiencing  
316 an increase in overweight and obesity increasing from 28% to 37.8% from 2011 to 2018.  
317 Both, DBMHL and DBM, can co-exist with maternal-child BMI-WHZ concordance, as the  
318 increasing burden of DBM, with an increasing percentage of overweight children, could



319 be leading to the more recent findings of positives association of maternal-child weight  
320 status. Co-existence of these phenomena within the same society highlight the complexity  
321 of interventions and approaches required to address malnutrition among LMICs, as  
322 different regions and households are experiencing various challenges.

323 To our knowledge, there are no studies which specifically investigate the  
324 relationship between maternal and child concordance under-five stratified by 2 years of  
325 age, as we analyzed in this study. These findings, which show a positive association  
326 between maternal BMI and child WHZ only in the 2 to 5 age group, potentially indicate  
327 that concordance between child WHZ and maternal BMI is 'unmasked' after age 2, when  
328 the majority of early childhood catch-up growth has occurred [37–39]. As in, children who  
329 may be born SGA may not show concordance of WHZ with maternal BMI during the first  
330 two years of life, but as they experience their expected catch up growth and have spent  
331 more time in a shared environment with their mothers, their weight status starts to become  
332 concordant with their mothers, as seen by our analysis which shows the difference in  
333 association between children older than and younger than two. This suggests that  
334 children under-two who do not initially appear to have WHZ concordant to their mother's  
335 BMI may develop this positive relationship later in life. Furthermore, a targeted review on  
336 maternal and child overweight and obesity in LMICs shows that junk food, such as potato  
337 chips, sponge cakes, sugary biscuits, and sugary drinks are a significant part of child diet  
338 by the first two years of life [57], potentially yielding an avenue of intervention and an  
339 explanation for the development of mother-child concordance after two years of age. This  
340 relationship could also be affected by other dietary aspects such as breastfeeding status  
341 and weaning, as prolongation of breastfeeding has been shown to decrease excess

342 weight gain in children [58]. Overall, this may indicate an avenue for early interventions  
343 for weight-related risks in children, where healthier nutritional sources during infancy may  
344 lead to a decreased sharing of NCD risk found between very young children and their  
345 mothers as children age.

346       Regarding other covariates which were analyzed, we showed wealth index as a  
347 statistically significant positive factor across all GLM analyses. This association existing  
348 in Pakistan is well established in the literature [59–64]. Increasing wealth quintile has  
349 been suggested to correlate with access to nutrient rich foods and increased sedentary  
350 behaviors [18,65–68].

351       Considering strengths of this study, the analysis was done on a nationally  
352 representative dataset which involved a complex sampling process to obtain the best  
353 possible demographic snapshot of Pakistan. The analysis also included a significant  
354 number of covariates to unveil potential confounders and used rigid levels of correction  
355 and validation regarding significance and multi-collinearity. Limitations of the study  
356 included the use of cross-sectional data, whereas a cohort study could provide more in-  
357 depth data on trends in specific households.

358       Overall, the findings of maternal-child concordance and, more specifically, the  
359 ‘masking’ phenomenon could have important implications regarding interventions and  
360 policy making, where these seemingly non-concordant groups may be ignored as an  
361 avenue to improve NCD risk unless there is data suggesting that the concordance may  
362 ‘unmask’ later. Future work should involve more detailed data collection of  
363 cardiometabolic disease and, more broadly, NCD risk concordance and outcome

364 concordance on entire households, including young children, to develop family-wide  
365 interventions to reduce long-term mortality from these diseases.

## 366 **Acknowledgements**

367 We thank the DHS Program supported by USAID, the National Institute of Population  
368 Studies, and ICF for the data used in this study. We also thank the Emory Global  
369 Diabetes Research Center and Global Health Equity Scholars NIH FIC TW010540.

## 370 **References**

- 371 1. Park HS, Park JY, Cho SI. Familial aggregation of the metabolic syndrome in Korean families  
372 with adolescents. *Atherosclerosis*. 2006 May 1;186(1):215–21.
- 373 2. Dong F, Howard AG, Herring AH, Adair LS, Thompson AL, Popkin BM, et al. Concordance of  
374 haemoglobin A1c, blood pressure and C-reactive protein between children and their  
375 parents in Chinese households. *Pediatric Obesity*. 2017;12(5):422–30.
- 376 3. Feng Y, Zang T, Xu X, Xu X. Familial Aggregation of Metabolic Syndrome and Its Components  
377 in a Large Chinese Population. *Obesity*. 2008;16(1):125–9.
- 378 4. Gupta S, Kapoor S. GENETIC AND ENVIRONMENTAL INFLUENCES ON BLOOD PRESSURE IN  
379 AN URBAN INDIAN POPULATION. *Journal of Biosocial Science*. 2013 Jan;45(1):1–11.
- 380 5. Kim HC, Kang DR, Choi KS, Nam CM, Thomas GN, Suh I. Spousal Concordance of Metabolic  
381 Syndrome in 3141 Korean Couples: A Nationwide Survey. *Annals of Epidemiology*. 2006 Apr  
382 1;16(4):292–8.
- 383 6. Lee MH, Kim HC, Thomas GN, Ahn SV, Hur NW, Choi DP, et al. Familial concordance of  
384 metabolic syndrome in Korean population—Korean National Health and Nutrition  
385 Examination Survey 2005. *Diabetes Research and Clinical Practice*. 2011 Sep 1;93(3):430–6.
- 386 7. Patel SA, Dhillon PK, Kondal D, Jeemon P, Kahol K, Manimunda SP, et al. Chronic disease  
387 concordance within Indian households: A cross-sectional study. *PLOS Medicine*. 2017 Sep  
388 29;14(9):e1002395.
- 389 8. Smith KR, Zick CD. Linked Lives, Dependent Demise? Survival Analysis of Husbands and  
390 Wives. *Demography*. 1994 Feb 1;31(1):81–93.

- 391 9. Umberson D. Family Status and Health Behaviors: Social Control as a Dimension of Social  
392 Integration. *Journal of Health and Social Behavior*. 1987;28(3):306–19.
- 393 10. Meyler D, Stimpson JP, Peek MK. Health concordance within couples: A systematic review.  
394 *Social Science & Medicine*. 2007 Jun 1;64(11):2297–310.
- 395 11. Hawkins SS, Cole TJ, Law C, Group and the MCSCHE. An ecological systems approach to  
396 examining risk factors for early childhood overweight: findings from the UK Millennium  
397 Cohort Study. *Journal of Epidemiology & Community Health*. 2009 Feb 1;63(2):147–55.
- 398 12. Reilly JJ, Armstrong J, Dorosty AR, Emmett PM, Ness A, Rogers I, et al. Early life risk factors  
399 for obesity in childhood: cohort study. *BMJ*. 2005 Jun 9;330(7504):1357.
- 400 13. Salsberry PJ, Reagan PB. Dynamics of Early Childhood Overweight. *Pediatrics*. 2005 Dec  
401 1;116(6):1329–38.
- 402 14. Robinson SM. Preventing childhood obesity: Early-life messages from epidemiology.  
403 *Nutrition Bulletin*. 2017;42(3):219–25.
- 404 15. Clifford SA, Gillespie AN, Olds T, Grobler AC, Wake M. Body composition: population  
405 epidemiology and concordance in Australian children aged 11–12 years and their parents.  
406 *BMJ Open* [Internet]. 2019 Jul 1 [cited 2021 Nov 2];9(Suppl 3). Available from:  
407 [https://bmjopen.bmj.com/content/9/Suppl\\_3/95](https://bmjopen.bmj.com/content/9/Suppl_3/95)
- 408 16. Gibson LY, Byrne SM, Davis EA, Blair E, Jacoby P, Zubrick SR. The role of family and maternal  
409 factors in childhood obesity. *Medical Journal of Australia*. 2007;186(11):591–5.
- 410 17. Cesare MD, Bhatti Z, Soofi SB, Fortunato L, Ezzati M, Bhutta ZA. Geographical and  
411 socioeconomic inequalities in women and children’s nutritional status in Pakistan in 2011:  
412 an analysis of data from a nationally representative survey. *The Lancet Global Health*. 2015  
413 Apr 1;3(4):e229–39.
- 414 18. Bishwajit G, Yaya S. Overweight and obesity among under-five children in South Asia. *Child  
415 and Adolescent Obesity*. 2020 Jan 1;3(1):105–21.
- 416 19. United Nations Population Division. *World Population Prospects: The 2022 Revision*  
417 [Internet]. United Nations, Department of Economic and Social Affairs, Population Division  
418 (2022). [cited 2022 Dec 4]. Available from: [population.un.org/wpp](https://population.un.org/wpp)
- 419 20. Government of Pakistan, UNICEF. *National Nutrition Survey 2018 - Full Report (3 Volumes)  
420 & Key Findings Report* [Internet]. Islamabad, Pakistan: UNICEF; 2020 Oct. Available from:  
421 [https://www.unicef.org/pakistan/reports/national-nutrition-survey-2018-full-report-3-  
422 volumes-key-findings-report](https://www.unicef.org/pakistan/reports/national-nutrition-survey-2018-full-report-3-volumes-key-findings-report)

- 423 21. National Institute of Population Studies (NIPS) [Pakistan], ICF. Pakistan Demographic and  
424 Health Survey 2017-18 [Internet]. Islamabad, Pakistan and Rockville, Maryland, USA: NIPS  
425 and ICF; 2019. Available from: <http://dhsprogram.com/pubs/pdf/FR354/FR354.pdf>
- 426 22. Black RE, Victora CG, Walker SP, Bhutta ZA, Christian P, de Onis M, et al. Maternal and child  
427 undernutrition and overweight in low-income and middle-income countries. *The Lancet*.  
428 2013 Aug 3;382(9890):427–51.
- 429 23. Nutrition and Food Safety WHO Team. WHO child growth standards:: Length/height-for-  
430 age, weight-for-age, weight-for-length, weight-for-height and body mass index-for-age;  
431 methods and development [Internet]. Geneva: WHO Press; 2006. 312 p. (WHO child growth  
432 standards). Available from: <https://www.who.int/publications/i/item/924154693X>
- 433 24. ICF. Demographic and Health Surveys Standard Recode Manual for DHS7 [Internet].  
434 Rockville, Maryland, USA: The Demographic and Health Surveys Program; [cited 2022 Dec  
435 4]. Available from:  
436 [https://dhsprogram.com/pubs/pdf/DHSG4/Recode7\\_DHS\\_10Sep2018\\_DHSG4.pdf](https://dhsprogram.com/pubs/pdf/DHSG4/Recode7_DHS_10Sep2018_DHSG4.pdf)
- 437 25. World Health Organization. Training Course on Child Growth Assessment [Internet].  
438 Geneva: WHO; 2008 [cited 2023 Jan 17] p. 58. Available from:  
439 <https://apps.who.int/iris/handle/10665/43601>
- 440 26. Abera L, Dejene T, Laelago T. Prevalence of malnutrition and associated factors in children  
441 aged 6–59 months among rural dwellers of damot gale district, south Ethiopia: community  
442 based cross sectional study. *International Journal for Equity in Health*. 2017 Jun  
443 26;16(1):111.
- 444 27. Mushtaq MU, Gull S, Shahid U, Shafique MM, Abdullah HM, Shad MA, et al. Family-based  
445 factors associated with overweight and obesity among Pakistani primary school children.  
446 *BMC Pediatr*. 2011 Dec;11(1):1–10.
- 447 28. Siddiqa M, Zubair A, Kamal A, Ijaz M, Abushal T. Prevalence and associated factors of  
448 stunting, wasting and underweight of children below five using quintile regression analysis  
449 (PDHS 2017–2018). *Sci Rep*. 2022 Nov 25;12(1):20326.
- 450 29. Mamabolo RL, Alberts M, Steyn NP, Waal HAD van de, Levitt NS. Prevalence and  
451 determinants of stunting and overweight in 3-year-old black South African children residing  
452 in the Central Region of Limpopo Province, South Africa. *Public Health Nutrition*. 2005  
453 Aug;8(5):501–8.
- 454 30. Fotso JC. Child health inequities in developing countries: differences across urban and rural  
455 areas. *International Journal for Equity in Health*. 2006 Jul 11;5(1):9.
- 456 31. Wieringa FT, Gauthier L, Greffeuille V, Som SV, Dijkhuizen MA, Lailou A, et al. Identification  
457 of Acute Malnutrition in Children in Cambodia Requires Both Mid Upper Arm Circumference

- 458 and Weight-For-Height to Offset Gender Bias of Each Indicator. *Nutrients*. 2018  
459 Jun;10(6):786.
- 460 32. Khan S, Zaheer S, Safdar NF. Determinants of stunting, underweight and wasting among  
461 children < 5 years of age: evidence from 2012-2013 Pakistan demographic and health  
462 survey. *BMC Public Health*. 2019 Dec;19(1):1–15.
- 463 33. Das S, Rahman RM. Application of ordinal logistic regression analysis in determining risk  
464 factors of child malnutrition in Bangladesh. *Nutr J*. 2011 Nov 14;10:124.
- 465 34. Hajian-Tilaki K, Heidari B. Childhood Obesity, Overweight, Socio-Demographic and Life Style  
466 Determinants among Preschool Children in Babol, Northern Iran. *Iran J Public Health*. 2013  
467 Nov;42(11):1283–91.
- 468 35. Trevor N. Croft, Aileen M.J. Marshall, Courtney K. Allen. Guide to DHS Statistics [Internet].  
469 Rockville, Maryland, USA: ICF; [cited 2022 Nov 22]. Available from:  
470 [https://dhsprogram.com/pubs/pdf/DHSG1/Guide\\_to\\_DHS\\_Statistics\\_DHS-7\\_v2.pdf](https://dhsprogram.com/pubs/pdf/DHSG1/Guide_to_DHS_Statistics_DHS-7_v2.pdf)
- 471 36. Lee AC, Katz J, Blencowe H, Cousens S, Kozuki N, Vogel JP, et al. National and regional  
472 estimates of term and preterm babies born small for gestational age in 138 low-income and  
473 middle-income countries in 2010. *Lancet Glob Health*. 2013 Jul;1(1):e26–36.
- 474 37. Cho WK, Suh BK. Catch-up growth and catch-up fat in children born small for gestational  
475 age. *Korean J Pediatr*. 2016 Jan;59(1):1–7.
- 476 38. Hokken-Koelega AC, De Ridder MA, Lemmen RJ, Den Hartog H, De Muinck Keizer-Schrama  
477 SM, Drop SL. Children born small for gestational age: do they catch up? *Pediatr Res*. 1995  
478 Aug;38(2):267–71.
- 479 39. Karlberg J, Albertsson-Wikland K. Growth in Full- Term Small-for-Gestational-Age Infants:  
480 From Birth to Final Height. *Pediatr Res*. 1995 Nov;38(5):733–9.
- 481 40. Thompson CG, Kim RS, Aloe AM, Becker BJ. Extracting the Variance Inflation Factor and  
482 Other Multicollinearity Diagnostics from Typical Regression Results. *Basic and Applied Social  
483 Psychology*. 2017 Mar 4;39(2):81–90.
- 484 41. Holm S. A Simple Sequentially Rejective Multiple Test Procedure. *Scandinavian Journal of  
485 Statistics*. 1979;6(2):65–70.
- 486 42. Aickin M, Gensler H. Adjusting for multiple testing when reporting research results: the  
487 Bonferroni vs Holm methods. *Am J Public Health*. 1996 May;86(5):726–8.
- 488 43. Anik AI, Rahman MM, Rahman MM, Tareque MI, Khan MN, Alam MM. Double burden of  
489 malnutrition at household level: A comparative study among Bangladesh, Nepal, Pakistan,  
490 and Myanmar. *PLOS ONE*. 2019 Aug 16;14(8):e0221274.

- 491 44. Jehn M, Brewis A. Paradoxical malnutrition in mother–child pairs: Untangling the  
492 phenomenon of over- and under-nutrition in underdeveloped economies. *Economics &*  
493 *Human Biology*. 2009 Mar 1;7(1):28–35.
- 494 45. Oddo VM, Rah JH, Semba RD, Sun K, Akhter N, Sari M, et al. Predictors of maternal and child  
495 double burden of malnutrition in rural Indonesia and Bangladesh. *The American Journal of*  
496 *Clinical Nutrition*. 2012 Apr 1;95(4):951–8.
- 497 46. Fernald LC, Neufeld LM. Overweight with concurrent stunting in very young children from  
498 rural Mexico: prevalence and associated factors. *Eur J Clin Nutr*. 2007 May;61(5):623–32.
- 499 47. Garrett JL, Ruel MT. Stunted Child–Overweight Mother Pairs: Prevalence and Association  
500 with Economic Development and Urbanization. *Food Nutr Bull*. 2005 Jan 1;26(2):209–21.
- 501 48. Doak CM, Adair LS, Bentley M, Monteiro C, Popkin BM. The dual burden household and the  
502 nutrition transition paradox. *Int J Obes*. 2005 Jan;29(1):129–36.
- 503 49. Doak CM, Adair LS, Monteiro C, Popkin BM. Overweight and Underweight Coexist within  
504 Households in Brazil, China and Russia. *The Journal of Nutrition*. 2000 Dec 1;130(12):2965–  
505 71.
- 506 50. Kosaka S, Umezaki M. A systematic review of the prevalence and predictors of the double  
507 burden of malnutrition within households. *British Journal of Nutrition*. 2017  
508 Apr;117(8):1118–27.
- 509 51. Davis JN, Oaks BM, Engle-Stone R. The Double Burden of Malnutrition: A Systematic Review  
510 of Operational Definitions. *Current Developments in Nutrition*. 2020 Sep 1;4(9):nzaa127.
- 511 52. Biswas T, Townsend N, Magalhaes RJS, Hasan M, Mamun A. Patterns and determinants of  
512 the double burden of malnutrition at the household level in South and Southeast Asia. *Eur J*  
513 *Clin Nutr*. 2021 Feb;75(2):385–91.
- 514 53. Popkin BM, Corvalan C, Grummer-Strawn LM. Dynamics of the double burden of  
515 malnutrition and the changing nutrition reality. *The Lancet*. 2020 Jan 4;395(10217):65–74.
- 516 54. Wells JC, Sawaya AL, Wibaek R, Mwangome M, Poullas MS, Yajnik CS, et al. The double  
517 burden of malnutrition: aetiological pathways and consequences for health. *The Lancet*.  
518 2020 Jan 4;395(10217):75–88.
- 519 55. Shrimpton R, Rokx C. The Double Burden of Malnutrition [Internet]. World Bank; 2012  
520 [cited 2022 Dec 7]. 1. (Health, Nutrition and Population Discussion Papers). Available from:  
521 <http://elibrary.worldbank.org/doi/abs/10.1596/27417>
- 522 56. Double burden of malnutrition [Internet]. World Health Organization. World Health  
523 Organization; [cited 2022 Dec 7]. Available from: [http://www.who.int/nutrition/double-](http://www.who.int/nutrition/double-burden-malnutrition/en/)  
524 [burden-malnutrition/en/](http://www.who.int/nutrition/double-burden-malnutrition/en/)

- 525 57. Jaacks LM, Kavle J, Perry A, Nyaku A. Programming maternal and child overweight and  
526 obesity in the context of undernutrition: current evidence and key considerations for low-  
527 and middle-income countries. *Public Health Nutrition*. 2017 May;20(7):1286–96.
- 528 58. Griffiths LJ, Smeeth L, Hawkins SS, Cole TJ, Dezateux C. Effects of infant feeding practice on  
529 weight gain from birth to 3 years. *Archives of Disease in Childhood*. 2009 Aug 1;94(8):577–  
530 82.
- 531 59. Asim M, Nawaz Y. Child Malnutrition in Pakistan: Evidence from Literature. *Children*. 2018  
532 May;5(5):60.
- 533 60. District Government Tharparkar. Analysis of Nutritional Data Community-Based  
534 Management of Acute Malnutrition Project. Sindh, Pakistan: District Government  
535 Tharparkar; 2014.
- 536 61. Achakzai P, Khan R. NUTRITIONAL STATUS AND ASSOCIATED FACTORS AMONG CHILDREN  
537 LESS THAN FIVE YEARS OF AGE IN TEHSIL ZARGHOON TOWN, DISTRICT QUETTA,  
538 BALUCHISTAN. *J Ayub Med Coll Abbottabad*. 2016 Mar;28(1):146–51.
- 539 62. Khan GN, Turab A, Khan MI, Rizvi A, Shaheen F, Ullah A, et al. Prevalence and associated  
540 factors of malnutrition among children under-five years in Sindh, Pakistan: a cross-sectional  
541 study. *BMC Nutrition*. 2016 Nov 24;2(1):69.
- 542 63. Ali W, Ayub A, Hussain H. PREVALENCE AND ASSOCIATED RISK FACTORS OF UNDER  
543 NUTRITION AMONG CHILDREN AGED 6 TO 59 MONTHS IN INTERNALLY DISPLACED  
544 PERSONS OF JALozAI CAMP, DISTRICT NOWSHERA, KHYBER PAKHTUNKHWA. *J Ayub Med  
545 Coll Abbottabad*. 2015 Sep;27(3):556–9.
- 546 64. Gul R, Kibria Z. PREVALENCE AND PREDETERMINANTS OF MALNUTRITION IN CHILDREN  
547 UNDER 3 YEARS OF AGE IN THE TWO RURAL COMMUNITIES OF PESHAWAR. *Khyber Medical  
548 University Journal*. 2013;5(4).
- 549 65. Trang NHHD, Hong TK, van der Ploeg HP, Hardy LL, Kelly PJ, Dibley MJ. Longitudinal  
550 Sedentary Behavior Changes in Adolescents in Ho Chi Minh City. *American Journal of  
551 Preventive Medicine*. 2013 Mar 1;44(3):223–30.
- 552 66. Biadgilign S, Mgutshini T, Gebremichael B, Haile D, Berhanu L, Chitekwe S, et al. Correlates  
553 of Sedentary Time Among Children and Adolescents in Ethiopia: A Cross-Sectional Study.  
554 *Pediatric Exercise Science*. 2022 Jul 20;1(aop):1–8.
- 555 67. Carrillo-Larco RM, Miranda JJ, Bernabé-Ortiz A. Wealth index and risk of childhood  
556 overweight and obesity: evidence from four prospective cohorts in Peru and Vietnam. *Int J  
557 Public Health*. 2016 May 1;61(4):475–85.



558 68. Neupane S, K.C. P, Doku DT. Overweight and obesity among women: analysis of  
559 demographic and health survey data from 32 Sub-Saharan African Countries. BMC Public  
560 Health. 2016 Jan 13;16(1):30.

561

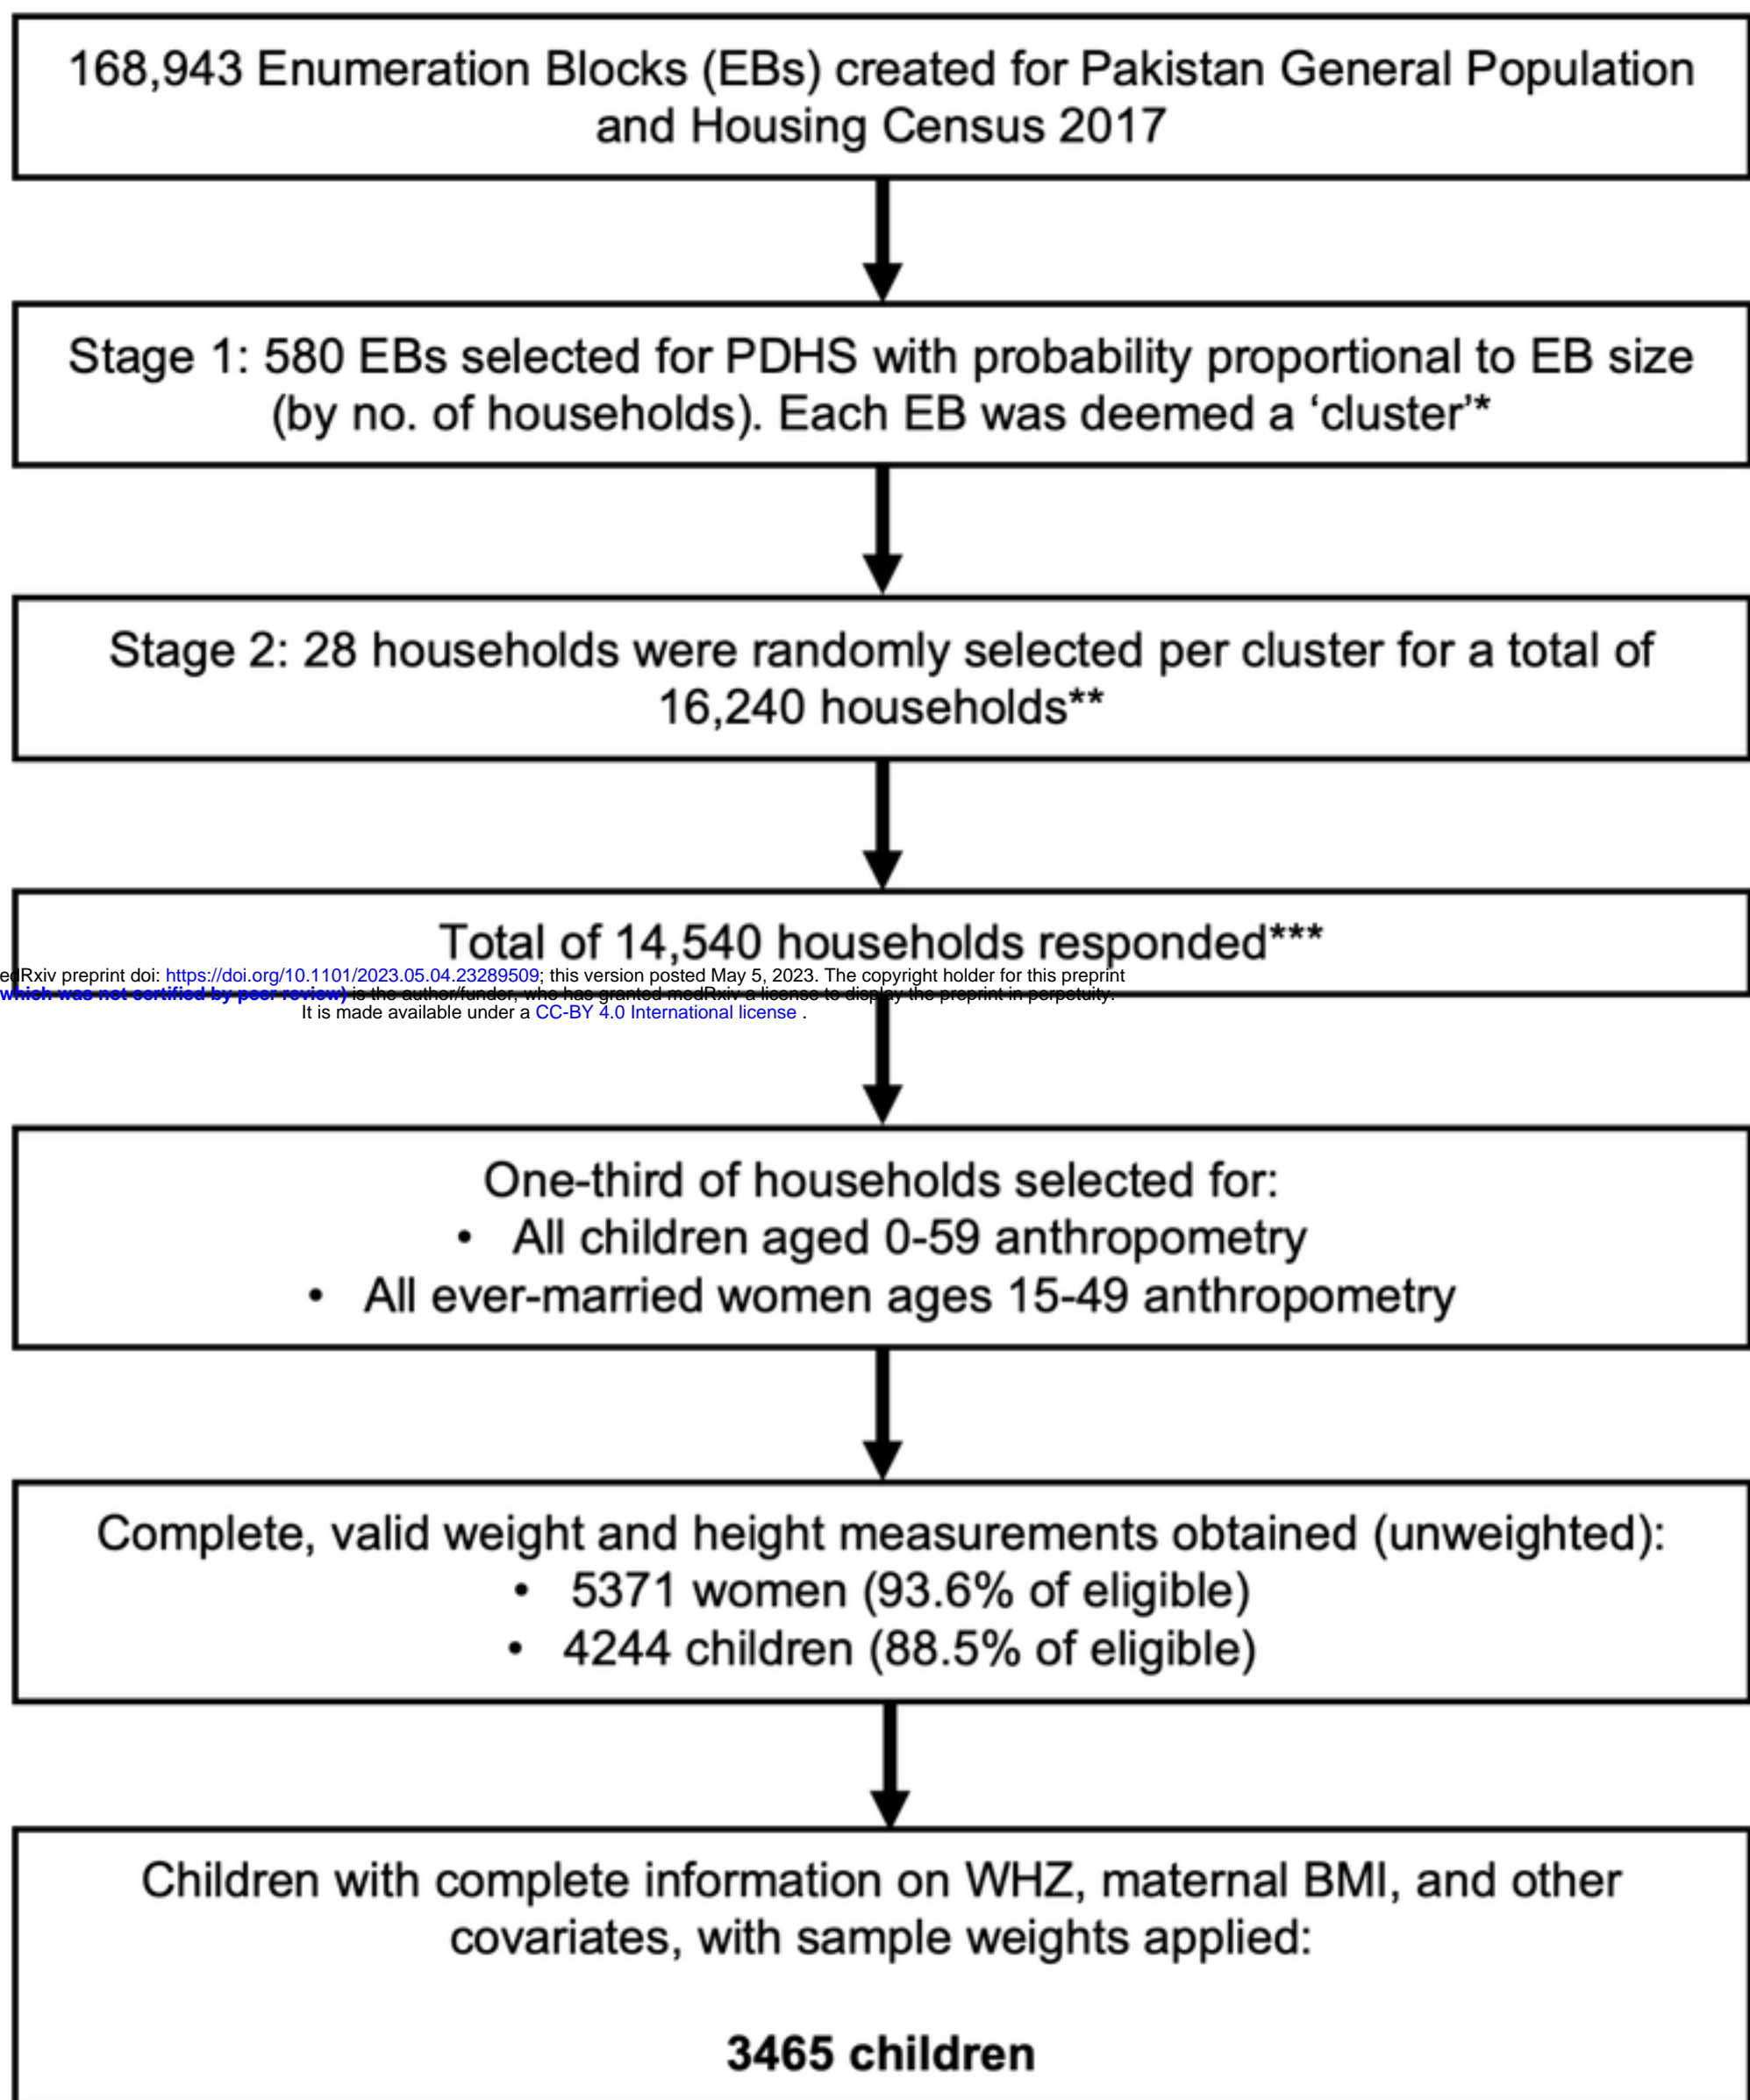

medRxiv preprint doi: <https://doi.org/10.1101/2023.05.04.23289509>; this version posted May 5, 2023. The copyright holder for this preprint (which was not certified by peer review) is the author/funder, who has granted medRxiv a license to display the preprint in perpetuity. It is made available under a [CC-BY 4.0 International license](https://creativecommons.org/licenses/by/4.0/).

\* If an EB was greater than 300 households, then the EB was segmented (determined by the field team before household listing) and only one segment was selected to form the cluster (probability of selection was proportional to the household size)

\*\* No replacements or changes of pre-selected households were allowed during the implementing stage.

\*\*\* Survey successfully administered in 561 out of 580 EBs, 19 clusters dropped due to security issues during the fieldwork.

Fig 1
